# Supplementary material for: β-Arrestin-2 Counters CXCR7-Mediated EGFR Transactivation and Proliferation
Source: Oxford University Press journal article supplement (doi:10.1158/1541-7786.mcr-15-0498), 2016-02-26
Supplement: 15417786mcr150498-sup-160061_1_supp_3355490_l2g1m2.docx [file 15417786mcr150498-sup-160061_1_supp_3355490_l2g1m2.docx]

**Supplementary Table 1(Table 1S):**

The primary antibodies used were: β-Actin (Cell Signaling, #5125s), β-arrestin-2 Antibody (SantaCruz Biotechnology, sc-13140), Akt Antibody (Cell Signaling, # 9272), phospho-Akt (pT308) (epitomics, #2214-1), phospho-Akt (pS473) (epitomics, #2118-1), Cyclin A (Cell Signaling, # 4656s), Cyclin D1 (Abcam, ab 134175), CXCR7 Antibody (Proteintech, 20423-1-AP, and customized Antibody from Abmart, GeneTech), EGFR Antibody (Cell Signaling, #2646), phospho-EGFR (pY1110) (Abcam, ab68470, ab47370), phospho-EGFR (pY1068) (Epitomics, 1138-1), Lamin A/C (epitomics, 2966-1), phospho-p44/42 MAPK (pERK1/2) (cell signaling, #9106s), p44/42 MAPK (cell signaling, #9102), Src Family (Tyr416) Antibody (Cell Signaling, #2108), phospho-Src Family (pY416) Antibody (Cell Signaling, #2101), ɑ-Tubulin Antibody (Cell Signaling, #2144). Blots were probed with a 1:10,000 dilution of an anti-rabbit or anti-mouse horseradish peroxidase-conjugated secondary antibody (Cell Signaling).

| Antibody to: | Source | Cat No. | Fold dilution or (µg/ml) |
| --- | --- | --- | --- |
| AKT  pAkt­T308  pAktS473 | Cell Signaling Inc  Epitomics  Epitomics | 9272  Epi-2214-1  EPI-2118-1 | 1:1000  1:10,000  1:10,000 |
| β-Actin | Cell Signaling | 5125s | 1:10,000 |
| β-AR2 | Santa Cruz Biotech. | Sc-13140 | 1: 400 |
| Cyclin D1 | Abcam | ab 134175 | 1:10,000 |
| CXCR7 | Proteintech, 20423-1-AP, and customized Antibody from Abmart | 20423-1 | 1:5,000/ 1:1000 |
| EGFR  pEGFRY1110  pEGFRY1068 | Cell Signaling, #2646  Abcam, ab68470, ab47370 | 2646  Ab68470  Ab47370 | 1: 5,000  1: 5,000  1: 3,000 |
| ERK1/2 (MAPK p44/p42)  Phospo-ERK1/2 | Cell Signaling  Cell Signaling | 9106s  9102 | 1: 5,000  1: 5,000 |
| Lamin A/C (epitomics, 2966-1) | Epitomics (Abcam) | Epi-2996-1 | 1: 10,000 |
| Src  pSrcY416 | Cell Signaling,  Cell SIgnaling | 2108  2101 | 1: 1000  1: 1000 |
| α-Tubulin | Cell Signaling | 2144 | 1: 1000 |
| Anti-Rabbit IgG | Cell Signaling | 7074s | 1:10,000 |
| Anti-Mouse IgG IgG(Fab)2-HRP | Cell signaling | 7076s | 1: 10,000 |
